# Supplementary material for: Taenia solium cysticercosis and taeniasis in urban settings: Epidemiological evidence from a health-center based study among people with epilepsy in Dar es Salaam, Tanzania
Source: PLOS journal article supplement (doi:10.1371/journal.pntd.0007751), 2019-12-06
Supplement: S4 (10.1371/journal.pntd.0007751.s004) [file journal.pntd.0007751.s004]

**S2 Table. Distribution of *T. solium* cysticercosis and taeniasis among people with epilepsy in the recruitment centers of Kinondoni district (1<sup>st</sup> examination).**

| Variables                | Recruited<br>PWE |       | PWE with<br>NCC |      | PWE with<br>CC-Ag |      | PWE with<br>CC-Abs |      | PWE with<br>taeniasis-Abs |      |
|--------------------------|------------------|-------|-----------------|------|-------------------|------|--------------------|------|---------------------------|------|
|                          | n                | %     | n               | %    | n                 | %    | n                  | %    | n                         | %    |
| Total                    | 302              | 100   | 5               | 1.66 | 3                 | 0.99 | 8                  | 2.65 | 2                         | 0.66 |
| Magomeni<br>Hospital     | 108              | 35.76 | 2               | 0.66 | 0                 | 0    | 3                  | 0.99 | 0                         | 0    |
| Tandale<br>Dispensary    | 26               | 8.61  | 0               | 0    | 0                 | 0    | 0                  | 0    | 0                         | 0    |
| Kiluvya<br>Health Center | 10               | 3.31  | 0               | 0    | 0                 | 0    | 0                  | 0    | 0                         | 0    |
| Mwananyamala<br>Hospital | 88               | 29.14 | 1               | 0.33 | 2                 | 0.66 | 3                  | 0.99 | 1                         | 0.33 |
| Sinza Hospital           | 23               | 7.62  | 0               | 0    | 0                 | 0    | 0                  | 0    | 0                         | 0    |
| Kimara<br>Dispensary     | 47               | 15.56 | 2               | 0.66 | 1                 | 0.33 | 2                  | 0.66 | 1                         | 0.33 |

PWE: people with epilepsy; NCC: neurocysticercosis; CC: cysticercosis; Ag: antigen; Abs: antibodies; n: number.
